# Supplementary material
Source: PubMed Central journal article supplement (PMC4976039)
Supplement: NIHMS772420-supplement-supplement_1.pdf [file NIHMS772420-supplement-supplement_1.pdf]

Supplemental Figures

**S1. RT-PCR primers for IRF2BP2:**

**Isoforms 1 and 2:**

Forward: AGTTCTGCTTCCCTTGCTCC

Reverse: AGGATGGTTGCAATTCCCC

**Isoform 2 only:**

Forward: CAGGTTGTTGGGTTTCGAGG

Reverse: GATCTTGAGCCCCTCTGTGG

Isotype Controls

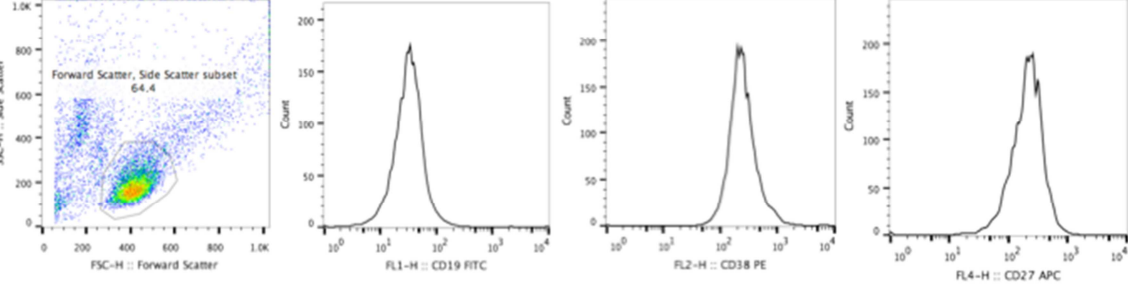

Control, day 7 +CPG

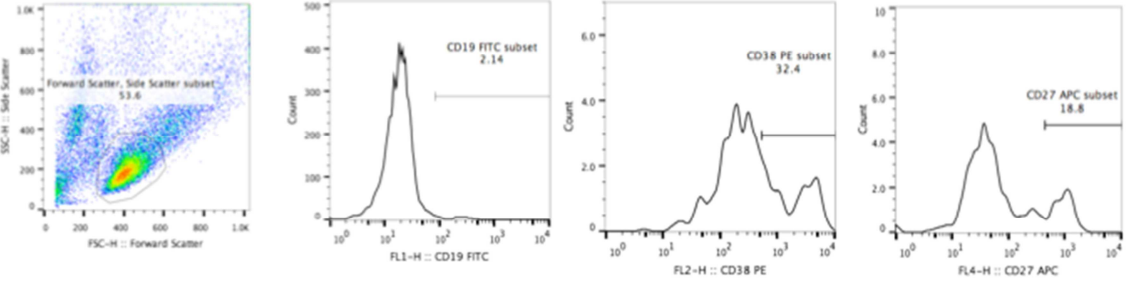

| Locus       | Func          | Gene           | Conserved         | sift | polyphen2 | Mutation Annotation          | ExAC Allele Count | ExAC Allelic Frequency | Related Gene in RAPID database | Description                                                                            | Function                                                                                                                                       |
|-------------|---------------|----------------|-------------------|------|-----------|------------------------------|-------------------|------------------------|--------------------------------|----------------------------------------------------------------------------------------|------------------------------------------------------------------------------------------------------------------------------------------------|
| chr9:11682  | nonsynonymous | AMBP           | 361:Name:lod:39   | 0    | 1         | uc004bie.3:c.C884T;p.P295L   | 16                | 0.0001329              |                                | Glycoprotein precursor of both alpha-1-microglobulin, and bikunin (trypsin inhibitor). |                                                                                                                                                |
| chr1:23474  | nonsynonymous | <b>IRF2BP2</b> | 729:Name:lod:1218 | 0    | 0.99      | uc001hwf.2:c.G1604A;p.S535N  | 0                 | 0                      | IRF8                           | Interferon regulatory factor 2 binding protein 2                                       | Transcriptional corepressor of IRF2                                                                                                            |
| chr10:1050  | nonsynonymous | INA            | 678:Name:lod:756  | 0.01 | 1         | uc001kws.2:c.C1157p.R39C     | 9                 | 0.00009472             |                                | Interneixin neuronal intermediate filament protein, alpha                              | Subunit of type IV neurofilaments                                                                                                              |
| chr14:5029  | nonsynonymous | SDCCAG1        | 636:Name:lod:512  | 0.01 | 1         | uc010anq.1:c.C526G;p.H176D   | 5                 | 0.00004132             |                                | nuclear export mediator factor                                                         | involved in nuclear export - N terminal export signal.                                                                                         |
| chr12:1869  | nonsynonymous | <b>PIK3C2G</b> | 613:Name:lod:412  | 0.01 | NA        | uc001rdt.2:c.A3466G;p.K1156E | 6                 | 0.0001156              | PIK3CD                         | PI3 kinase C2 gamma subunit                                                            | PI3K family - specific function not described for this protein<br>Binds oxysterols (byproducts of cholesterol biosynth), inhibits cytotoxicity |
| chr22:3130  | nonsynonymous | KIAA1664       | NA                | 0    | NA        | uc011alb.1:c.C2486T;p.P829L  | 5                 | 0.0001                 |                                | oxysterol binding protein 2                                                            | Unknown                                                                                                                                        |
| chr11:10195 | nonsynonymous | C1orf159       | NA                | 0    | 0.400973  | uc001acn.2:c.G682A;p.A228T   | 0                 | 0                      |                                | chromosome 1 open reading frame 159                                                    | Unknown                                                                                                                                        |
| chr11:1287  | nonsynonymous | C11orf45       | NA                | 0    | 0.392279  | uc001qeu.2:c.T181C;p.W61R    | 29                | 0.0002391              |                                | keratinocyte proline-rich protein                                                      | Unknown                                                                                                                                        |
| chr9:12342  | nonsynonymous | MEGF9          | 374:Name:lod:44   | 0.06 | NA        | uc004bkk.3:c.G516A;p.V206M   | 0                 | 0                      |                                | multiple EGF-like-domains 9                                                            | Unknown                                                                                                                                        |
| chr14:6824  | nonsynonymous | ZFYVE26        | 502:Name:lod:146  | 0.12 | 0.001     | uc001vka.2:c.G4943A;p.R1648H | 0                 | 0                      |                                | zinc finger, FYVE domain containing 26                                                 | Phosphatidylinositol 3-phosphate-binding protein, mutated in AR spastic paraplegia type 15                                                     |
| chr20:6194  | nonsynonymous | COL20A1        | 371:Name:lod:43   | 0.24 | NA        | uc011aav.1:c.T631A;p.S211T   | 0                 | 0                      |                                | collagen, type XX, alpha 1                                                             | Probable collagen associated protein                                                                                                           |
| chr1:22657  | nonsynonymous | <b>PARP1</b>   | 477:Name:lod:116  | 0.44 | 0.11      | uc001hqd.3:c.G518A;p.R173Q   | 13                | 0.0001071              |                                | poly (ADP-ribose) polymerase 1                                                         | Involved in repair of DNA damage (base excision repair), also may be downstream of MEK/ERK pathway                                             |

chr1: | 234,742,928 | 234,742,958 | 234,742,988 | 234,742,958 | 234,742,968 | 234,742,978 | 234,742,988 | 234,742,998 | 234,743,008 | 234,743,018 | 234,743,028 | 234,743,038 | 234,743,048 | 234,743,058 | 234,743,068 | 234,743,078 |

---| TTTCACATCTCGRCCAGGGRTGGTTGAMTTTCCCTTGCATRAAGGCCGAGGGGAGTGGAGCCAGCAGAGGGGATTTTCCCCAGTGGGCAATGAGCTCTGACACTCCCTGCTGTTTGTCTTTGCTGGAGCAGGGAGCCAGACTGTCCGA

Gap

Human K V D G A L I T A I E G Q M F R N P V N S G V L F C K E G S P C V V E G S A G Q Q K I S Q R S C P F C F K H S

Rhesus K V D G A L I T A I E G Q M F R N P V N S G V L F C K E G S P C V V E G S A G Q Q K I S Q R S C P F C F K H S

House K V D G A L I T A I E G Q M F R N P V N S G V L F C K E G S P C V V E G S A G Q Q K I S Q R S C P F C F K H S

Dog K V D G A L I T A I E G Q M F R N P V N S G V L F C K E G S P C V V E G S A G Q Q K I S Q R S C P F C F K H S

Elephant K V D G A L I T A I E G Q M F R N P V N S G V L F C K E G S P C V V E G S A G Q Q K I S Q R S C P F C F K H S

Chicken K V D G A L I T A I E G Q M F R N P V N S G V L F C K E G S P C V V E G S A G Q Q K I S Q R S C P F C F K H S

X.tropicalis K V D G A L I T A I E G Q M F R N P V N S G V L F C K E G S P C V V E G S A G Q Q K I S Q R S C P F C F K H S

Zebrafish K V D G A L I T A I E G Q M F R N P V N S G V L F C K E G S P C V V E G S A G Q Q K I S Q R S C P F C F K H S

Lamprey K V D G A L I T A I E G Q M F R N P V N S G V L F C K E G S P C V V E G S A G Q Q K I S Q R S C P F C F K H S

Gap

Human K V D G A L I T A I E G Q M F R N P V N S G V L F C K E G S P C V V E G S A G Q Q K I S Q R S C P F C F K H S

Rhesus K V D G A L I T A I E G Q M F R N P V N S G V L F C K E G S P C V V E G S A G Q Q K I S Q R S C P F C F K H S

House K V D G A L I T A I E G Q M F R N P V N S G V L F C K E G S P C V V E G S A G Q Q K I S Q R S C P F C F K H S

Dog K V D G A L I T A I E G Q M F R N P V N S G V L F C K E G S P C V V E G S A G Q Q K I S Q R S C P F C F K H S

Elephant K V D G A L I T A I E G Q M F R N P V N S G V L F C K E G S P C V V E G S A G Q Q K I S Q R S C P F C F K H S

Opossum K V D G A L I T A I E G Q M F R N P V N S G V L F C K E G S P C V V E G S A G Q Q K I S Q R S C P F C F K H S

Chicken K V D G A L I T A I E G Q M F R N P V N S G V L F C K E G S P C V V E G S A G Q Q K I S Q R S C P F C F K H S

X.tropicalis K V D G A L I T A I E G Q M F R N P V N S G V L F C K E G S P C V V E G S A G Q Q K I S Q R S C P F C F K H S

Zebrafish K V D G A L I T A I E G Q M F R N P V N S G V L F C K E G S P C V V E G S A G Q Q K I S Q R S C P F C F K H S

Multiz Alignments of 188 Vertebrates

Multiz Alignments of 46 Vertebrates
